# Supplementary material
Source: PubMed Central journal article supplement (PMC4151793)
Supplement: ac5003273_si_001.pdf [file ac5003273_si_001.pdf]

**Polyethyleneimine Carbon Nanotube Fiber Electrodes For Enhanced Detection of Neurotransmitters**

Alexander G. Zestos, Christopher B. Jacobs, Eleferios Trikantopoulos, Ashley E. Ross,

B. Jill Venton

Department of Chemistry, University of Virginia, Charlottesville, VA 22903

In the supporting information, we depict the co-detection of 2  $\mu\text{M}$  dopamine and 2  $\mu\text{M}$  serotonin using polyethyleneimine (PEI) CNT fiber microelectrodes. The two biomolecules are co-detected based on the different shape and position of their reduction peaks.

### Co-detection of Dopamine and Serotonin

We have explored the co-detection of dopamine and serotonin using flow injection analysis in Figure S-1. Two  $\mu\text{M}$  serotonin and 2  $\mu\text{M}$  dopamine were detected using a PEI-CNT fiber microelectrode (Figures S-1A and S1-B). Figure S-1C shows a cyclic voltammogram of a mixture of 2  $\mu\text{M}$  dopamine and 2  $\mu\text{M}$  serotonin. The applied waveform is from -0.4 to 1.0 V and back at 400 V/s, the typical dopamine waveform, because the serotonin waveform does not detect the reduction peak of dopamine.<sup>6</sup> The two molecules have an oxidation peak at the same potential; thus, they must be differentiated by their reduction peak. The reduction peak for dopamine is at approximately -200 mV, while the reduction peak for serotonin is a broad shoulder from 0 to 200 mV, a 400 mV difference. Previous work from our lab showed that dopamine and serotonin and can be differentiated on CFMEs dipcoated into CNT suspensions in DMF by 200 mV.<sup>6</sup> The data here for PEI-CNT microelectrodes is similar. Therefore, the PEI-CNT fiber microelectrodes allow for the co-detection of serotonin and dopamine without the requirement of being dip-coated in CNTs.

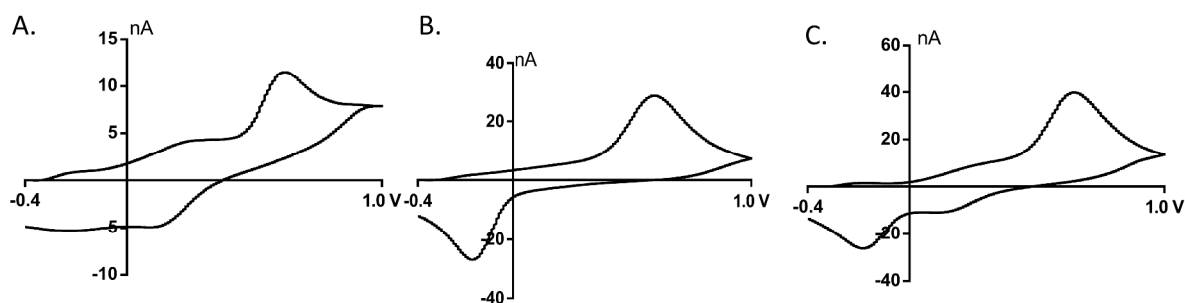

Figure S-1: Co-detection of serotonin and dopamine at PEI-CNT fiber microelectrodes. A). Cyclic voltammogram of 2  $\mu\text{M}$  serotonin B). Cyclic voltammogram of 2  $\mu\text{M}$  dopamine. C). Cyclic voltammogram of a mixture of 2  $\mu\text{M}$  serotonin and 2  $\mu\text{M}$  dopamine using a PEI CNT fiber microelectrode. The two molecules are differentiated from their reduction peaks. The reduction peak for dopamine is at approximately -200 mV, while the reduction peak for serotonin is a broad shoulder from 0 to 200 mV, a 400 mV difference.
